# Supplementary material
Source: publisher figshare collection journal article supplement (https://acs.figshare.com/ndownloader/files/21822639)
Supplement: Supplementary file 1 [file 21822639]

## Supporting Information

### Dual Action Ru(II) Complexes With Bulky $\pi$ -Expansive Ligands: Phototoxicity Without DNA Intercalation

Nicholas P. Toupin,<sup>1†</sup> Sandeep Nadella,<sup>1†</sup> Sean J. Steinke,<sup>2</sup> Claudia Turro,<sup>2\*</sup> Jeremy J.

Kodanko<sup>1,3\*</sup>

<sup>1</sup>Department of Chemistry, Wayne State University, 5101 Cass Ave, Detroit, MI 48202

<sup>2</sup>Department of Chemistry and Biochemistry, The Ohio State University, Columbus, OH 43210

<sup>3</sup>Barbara Ann Karmanos Cancer Institute, Detroit, MI 48201

<sup>†</sup>These authors contributed equally to this work

\*jkodanko@chem.wayne.edu

\*turro@chemistry.ohio-state.edu

#### **Table of Contents**

|                              |    |
|------------------------------|----|
| General Considerations ..... | S2 |
| Atropisomerism Figure .....  | S3 |
| Biological Assays.....       | S4 |
| Spectral Data .....          | S7 |

### **General Considerations**

MDA-MB-231 and DU-145 cells were obtained from American Type Culture Collection (Manassas, VA). Cells were cultured in Dulbecco's modified eagle's medium containing 10% FBS and 1000 units/ml penicillin/streptomycin and were grown at 37 °C and 5% CO<sub>2</sub>. Fluorescence assisted cell sorting (FACS) was performed using a Sysmex Cyflow Space fluorescence assisted cell sorter. Data obtained from FACS was processed using Flomax Fcs processing software. Blue light irradiation ( $\lambda_{\text{irr}} = 460\text{--}470\text{ nm}$ ) was performed using an LED panel, made in house, consisting of a project board fitted with 96, 60 mW 5mm blue LED diode bulbs from Chanzon (Shanzhen, China) that irradiate each well of a 96-well plate.

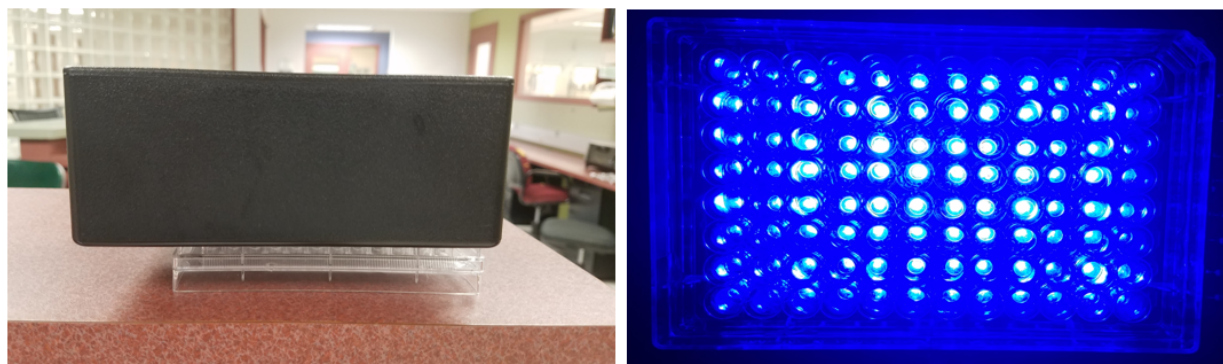

**Figure S1:** LED panel constructed in house. **Left:** Sideview of blue LED panel while turned off. **Right:** Bottom view of LED panel displaying fit onto 96-well plate while activated.

### Atrope Isomerism Figure

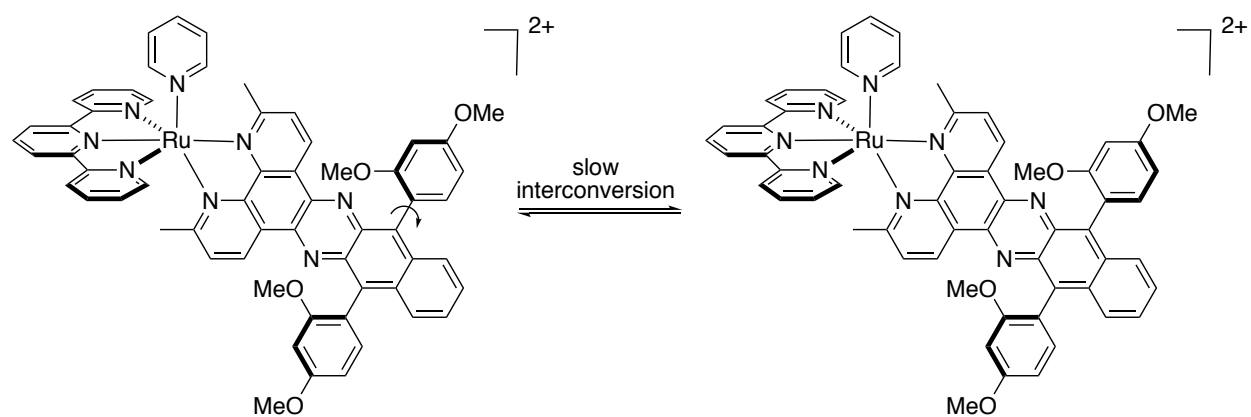

**Figure S2:** Proposed slow interconversion of atropisomers from **10** on the NMR timescale

## **Biological Assays**

### **1. DNA Binding Studies**

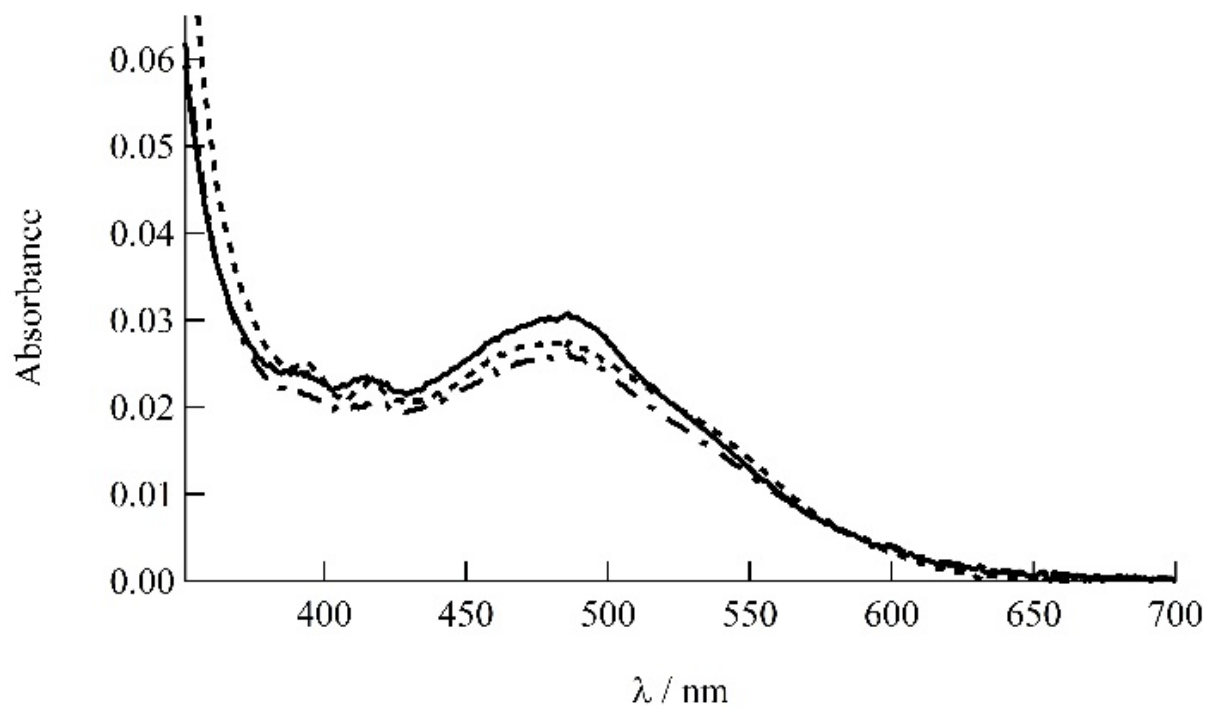

**Figure S3.** Electronic absorption spectrum of 5  $\mu$ M **8** (5 mM Tris, 50 mM NaCl, pH 7.0) alone (—) and in the presence of PSS (100  $\mu$ M) (---) and DNA (100  $\mu$ M bases) (-●-).

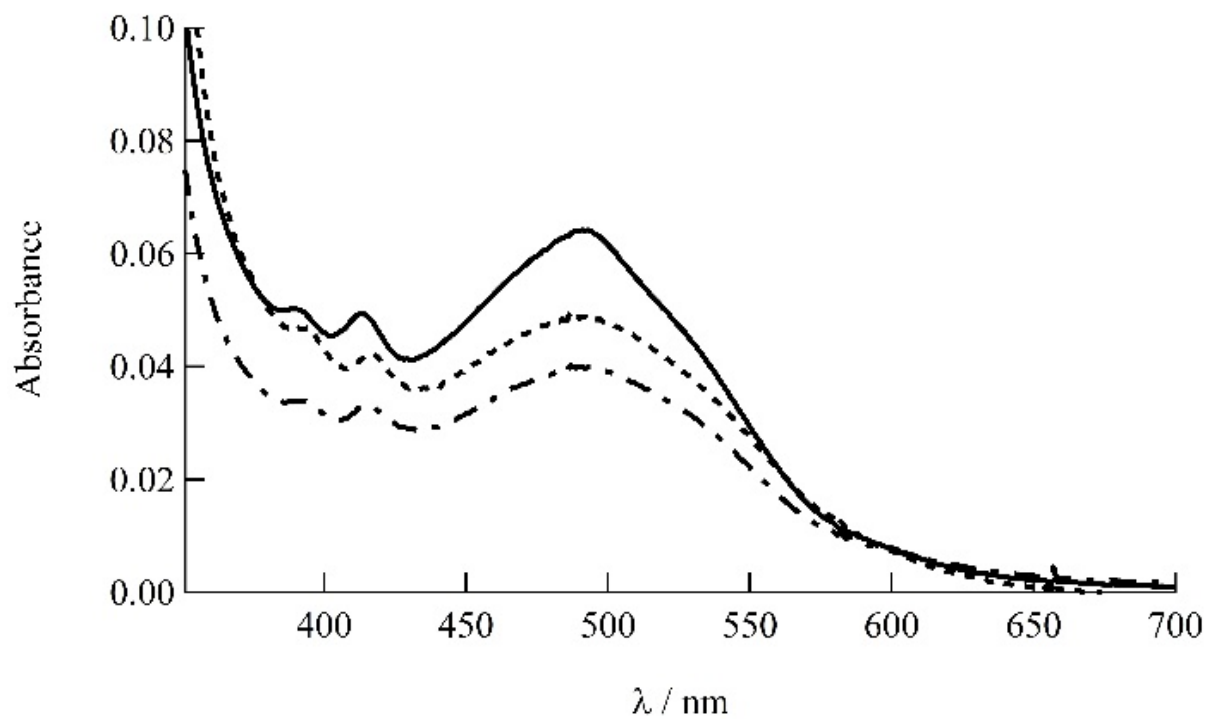

**Figure S4.** Electronic absorption spectrum of 5  $\mu$ M **9** (5 mM Tris, 50 mM NaCl, pH 7.0) alone (—) and in the presence of PSS (100  $\mu$ M) (---) and DNA (100  $\mu$ M bases) (-•-).

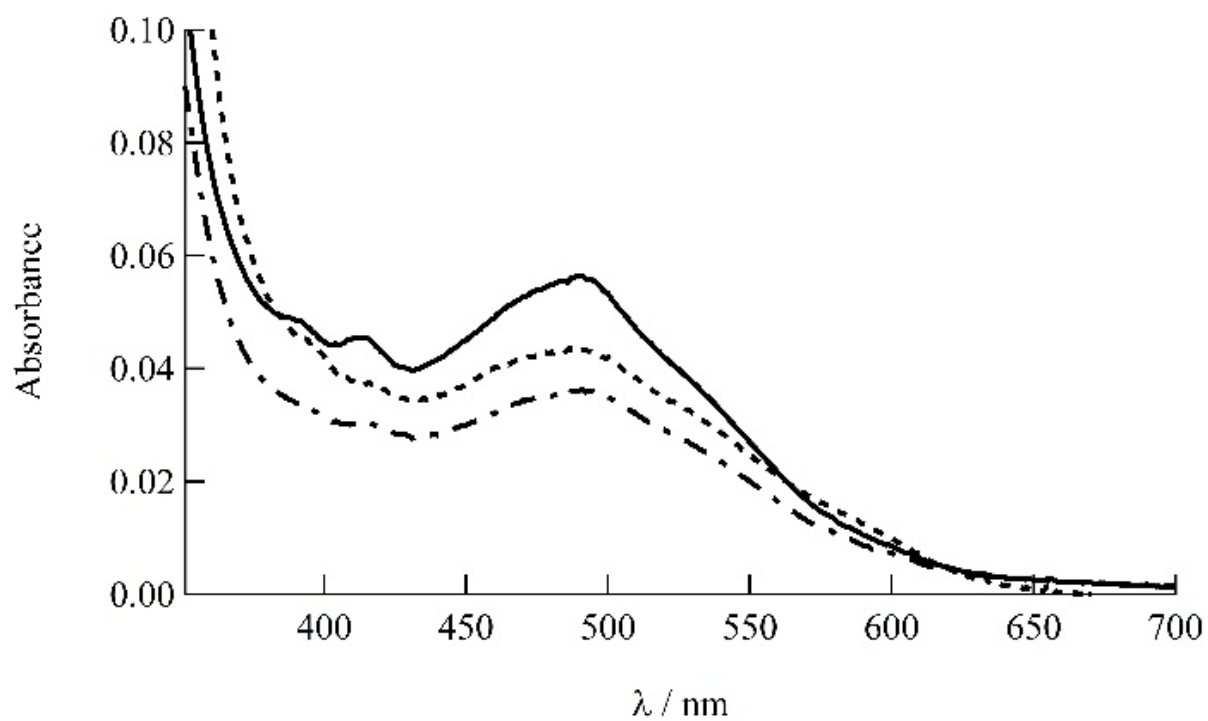

**Figure S5.** Electronic absorption spectrum of 5  $\mu$ M **10** (5 mM Tris, 50 mM NaCl, pH 7.0) alone (—) and in the presence of PSS (100  $\mu$ M) (---) and DNA (100  $\mu$ M bases) (-●-).

### Spectral Data

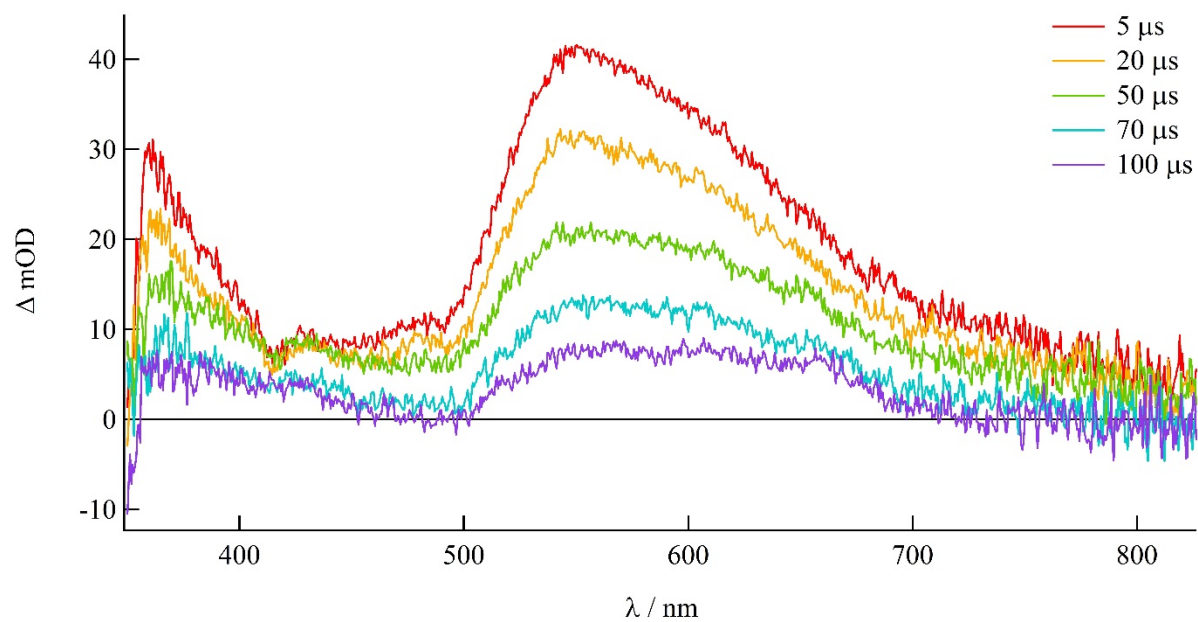

**Figure S6:** Transient absorption spectrum of **9** in deaerated pyridine

( $\lambda_{\text{irr}} = 500 \text{ nm}$ ,  $5.9 \text{ mJ/pulse}$ ,  $\text{fwhm} = 8 \text{ ns}$ ).

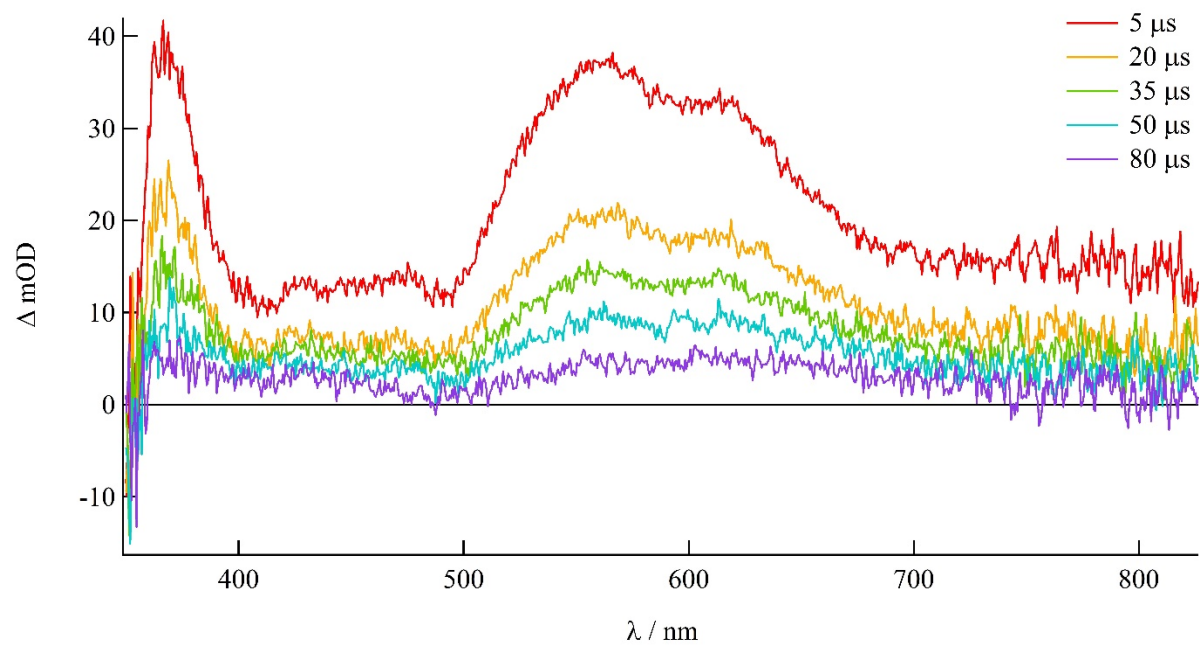

**Figure S7:** Transient absorption spectrum of **10** in deaerated pyridine

( $\lambda_{\text{irr}} = 500 \text{ nm}$ ,  $5.9 \text{ mJ/pulse}$ ,  $\text{fwhm} = 8 \text{ ns}$ ).



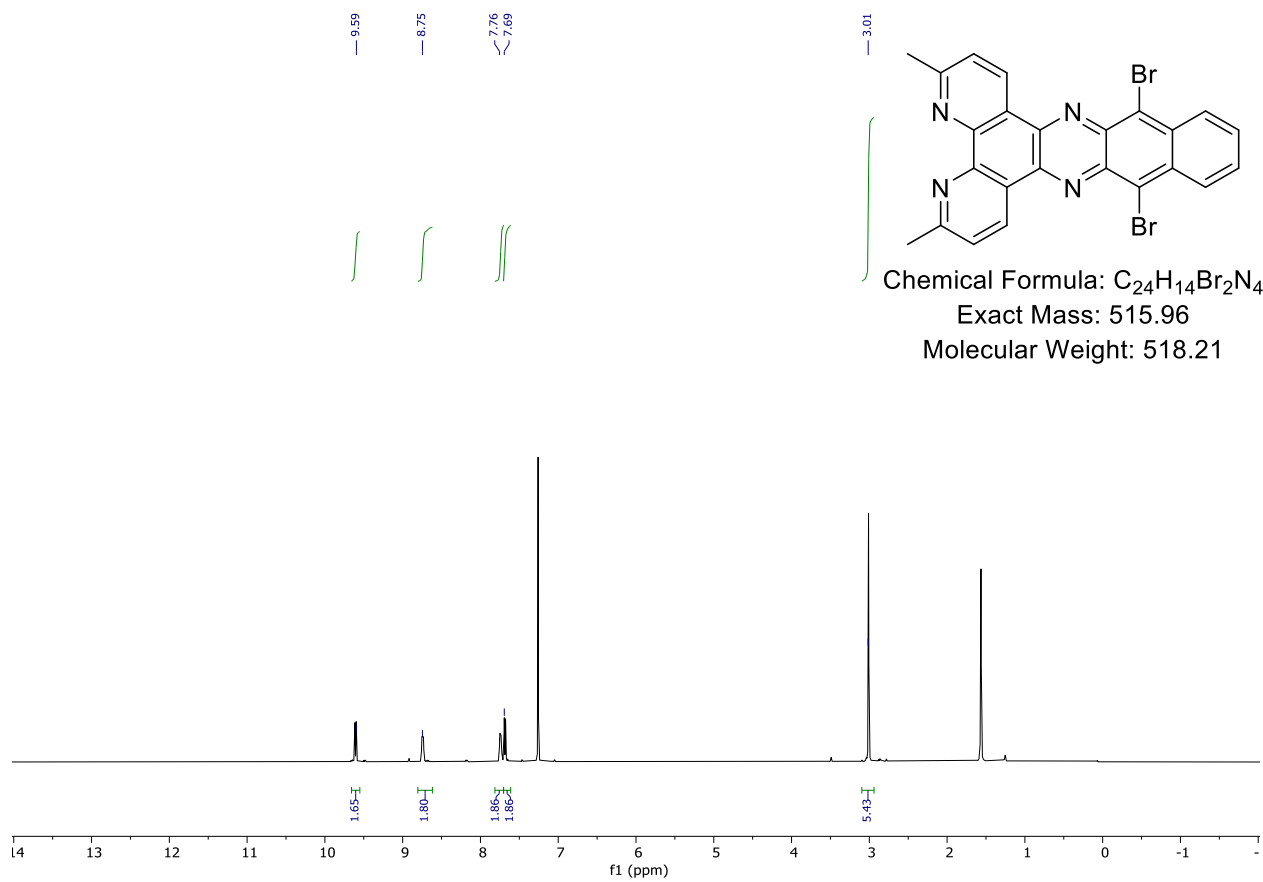

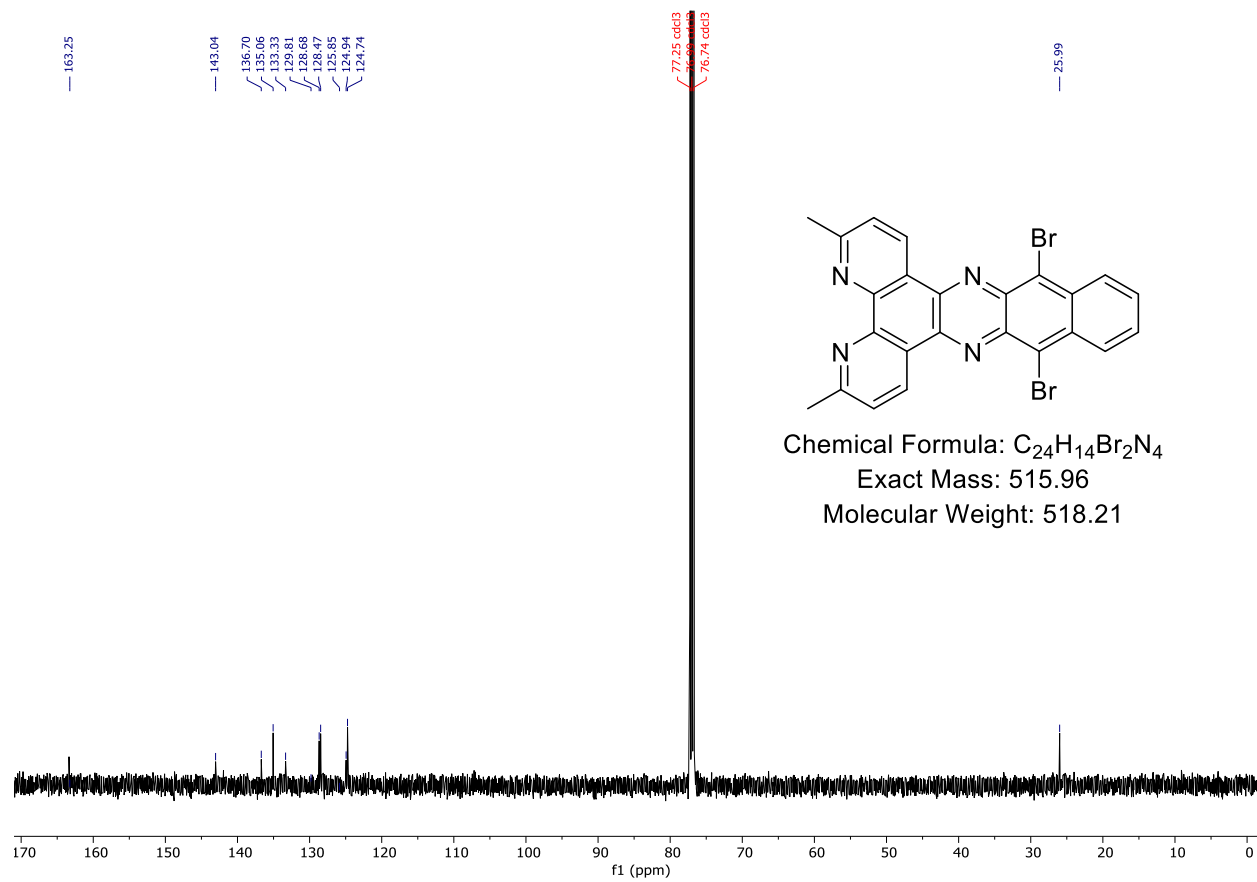

**Figure S9:**  $^{13}C$  NMR of compound **4** in  $CDCl_3$

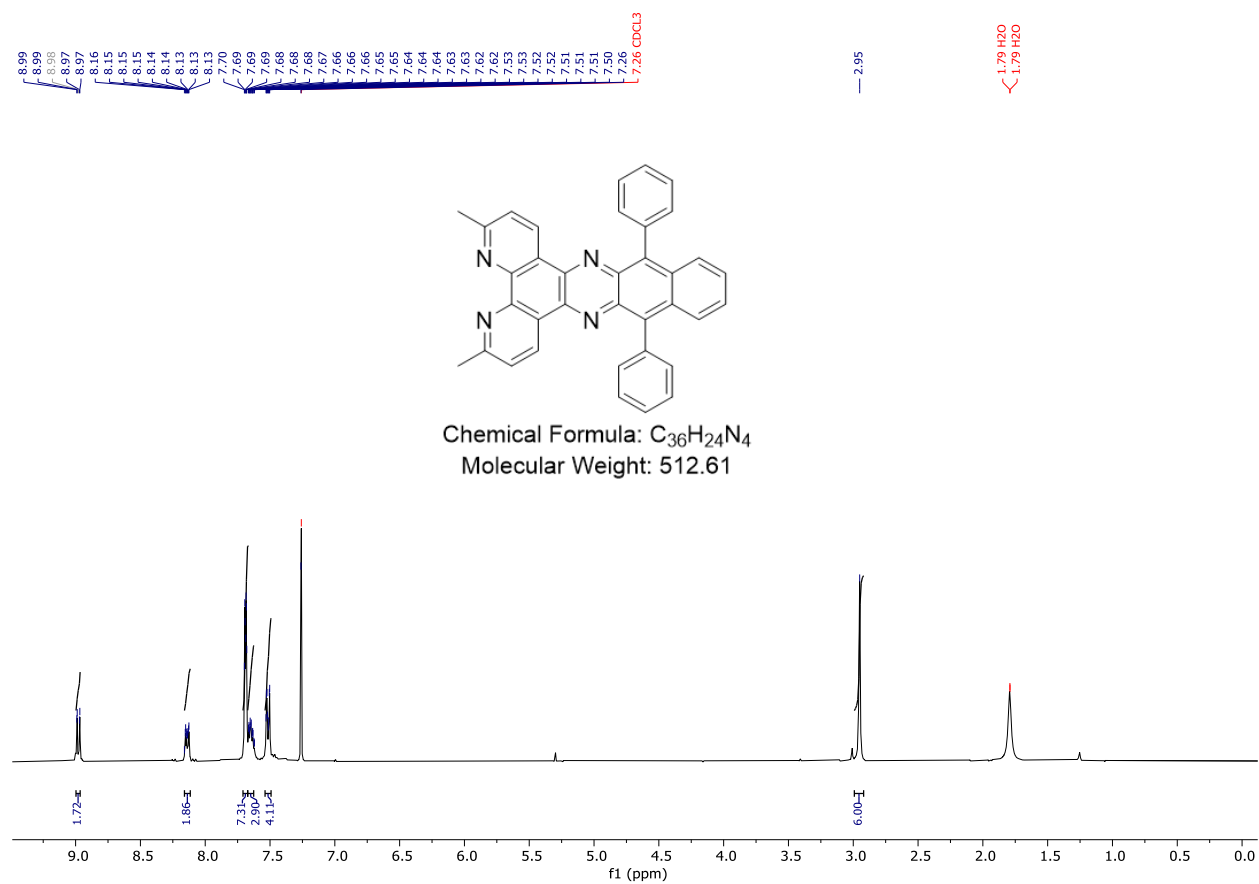

**Figure S10:**  $^1\text{H}$  NMR of compound **5** in  $\text{CDCl}_3$

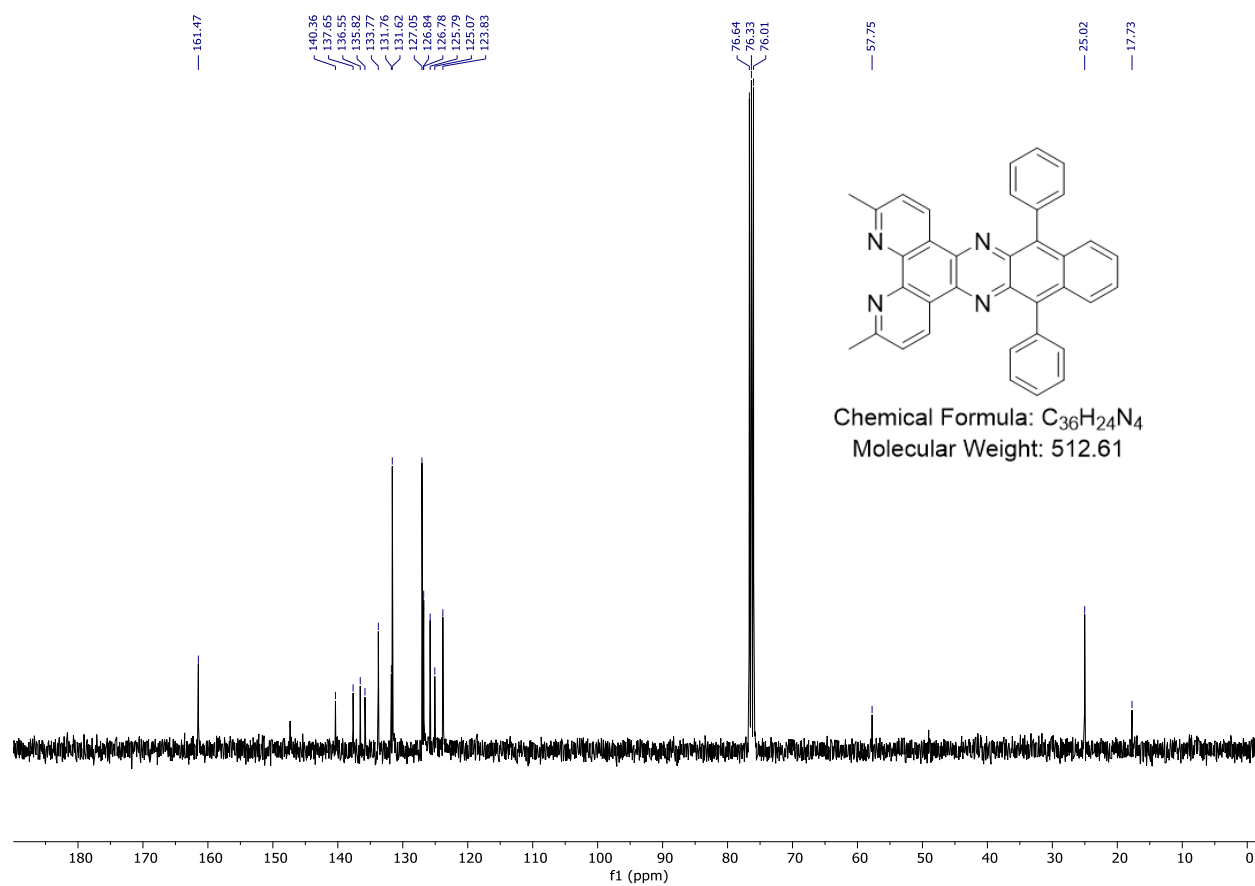

**Figure S11:**  $^{13}C$  NMR of compound **5** in  $CDCl_3$

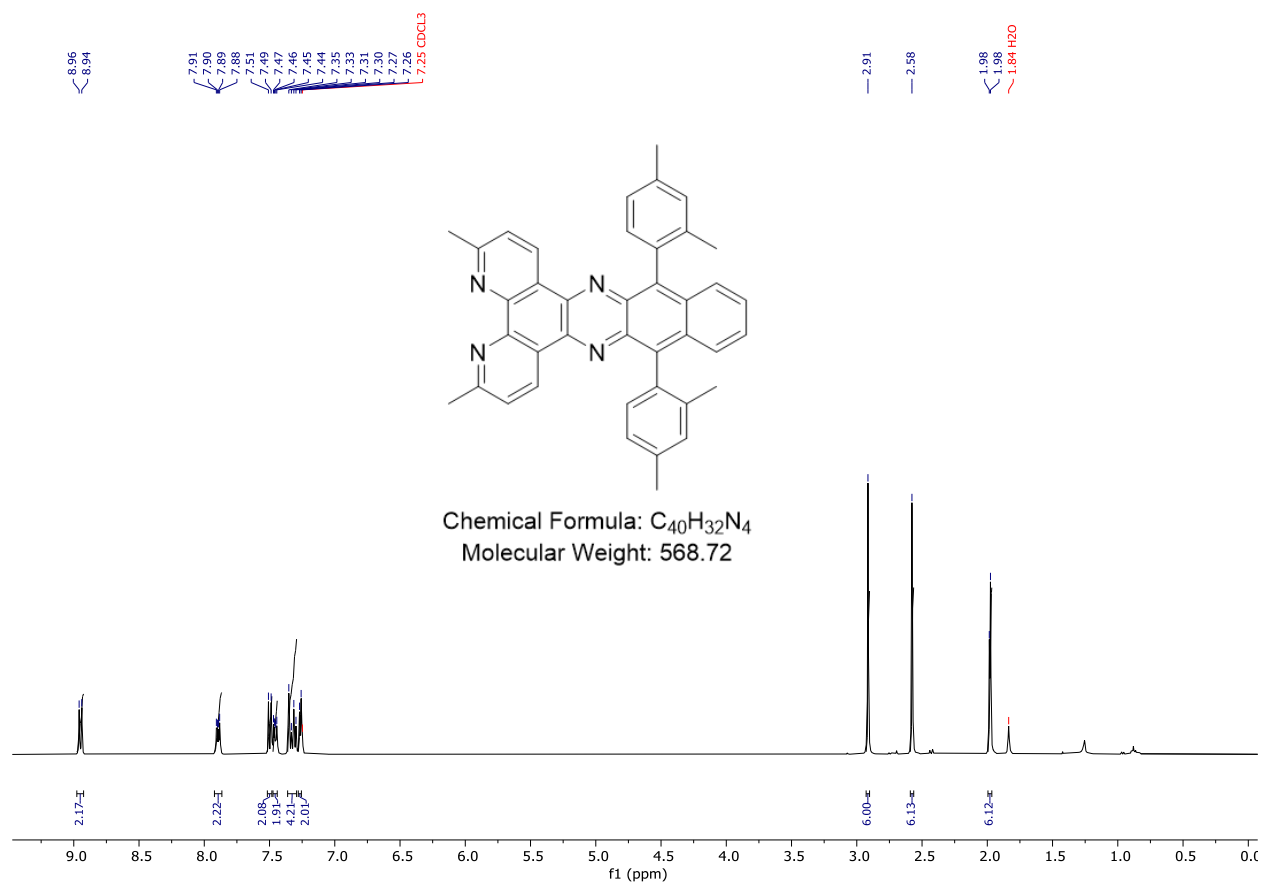

**Figure S12:**  $^1\text{H}$  NMR of compound **6** in  $\text{CDCl}_3$

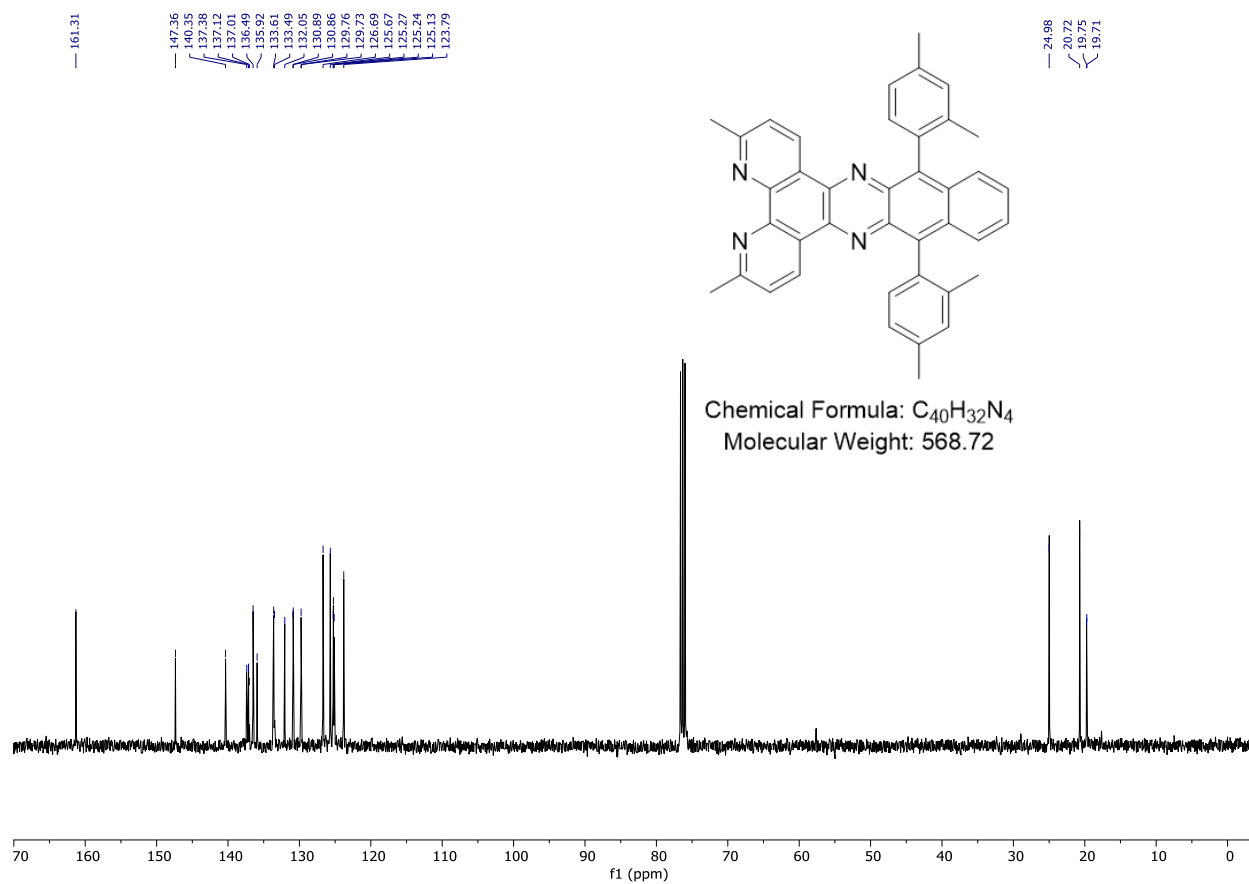

**Figure S13:**  $^{13}C$  NMR of compound **6** in  $CDCl_3$

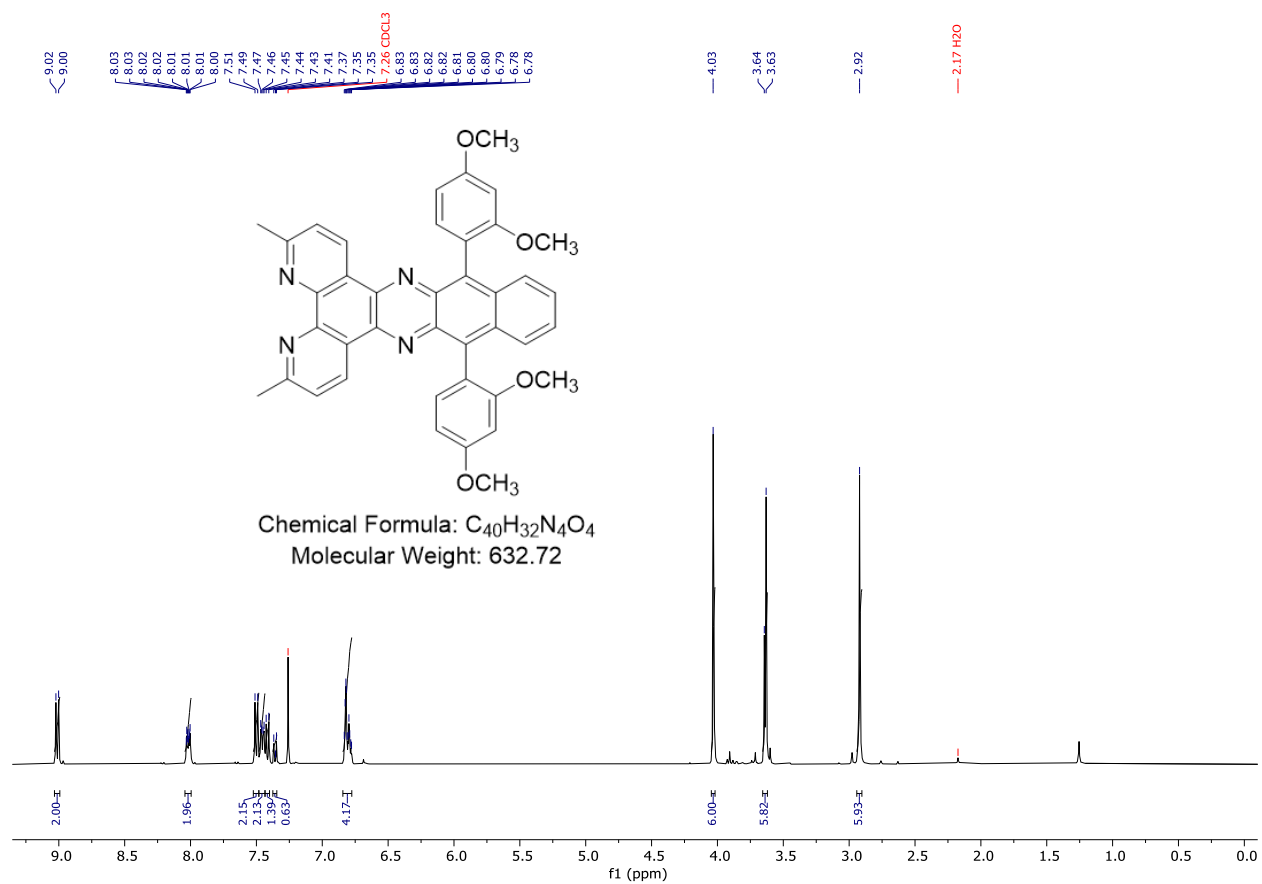

**Figure S14:**  $^1\text{H}$  NMR of compound 7 in  $\text{CDCl}_3$

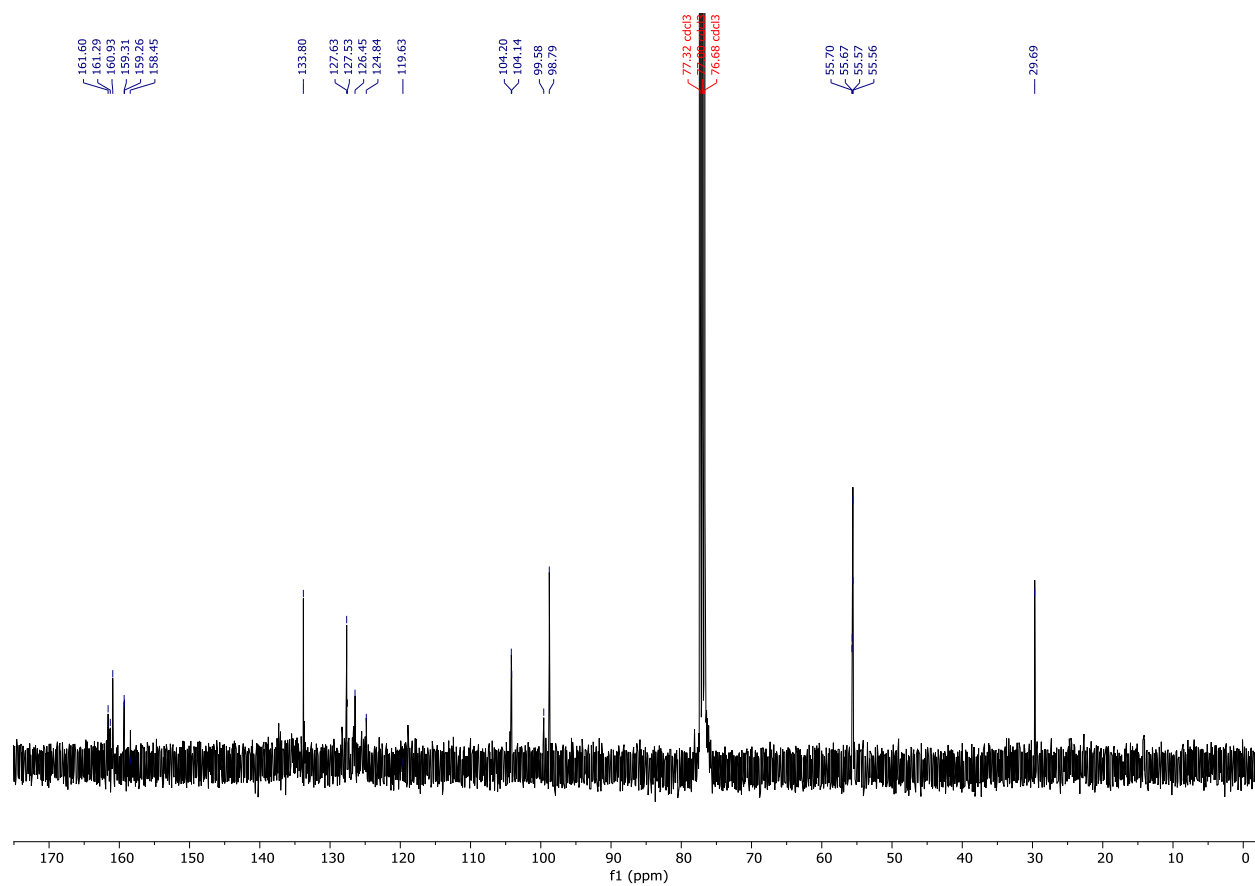

**Figure S15:** <sup>13</sup>C NMR of compound **7** in CDCl<sub>3</sub>



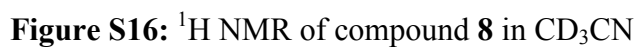

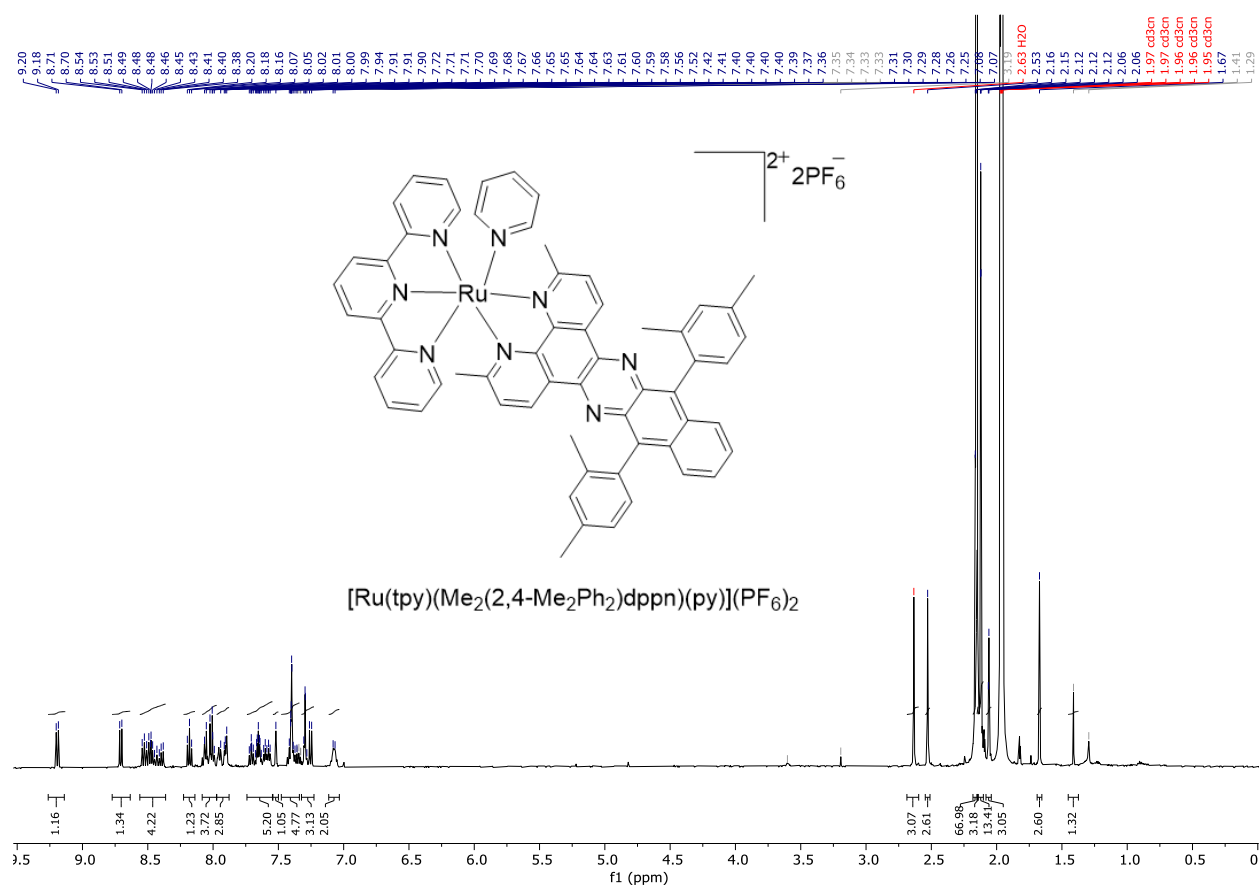

**Figure S17:**  $^1\text{H}$  NMR of compound **9** in  $\text{CD}_3\text{CN}$

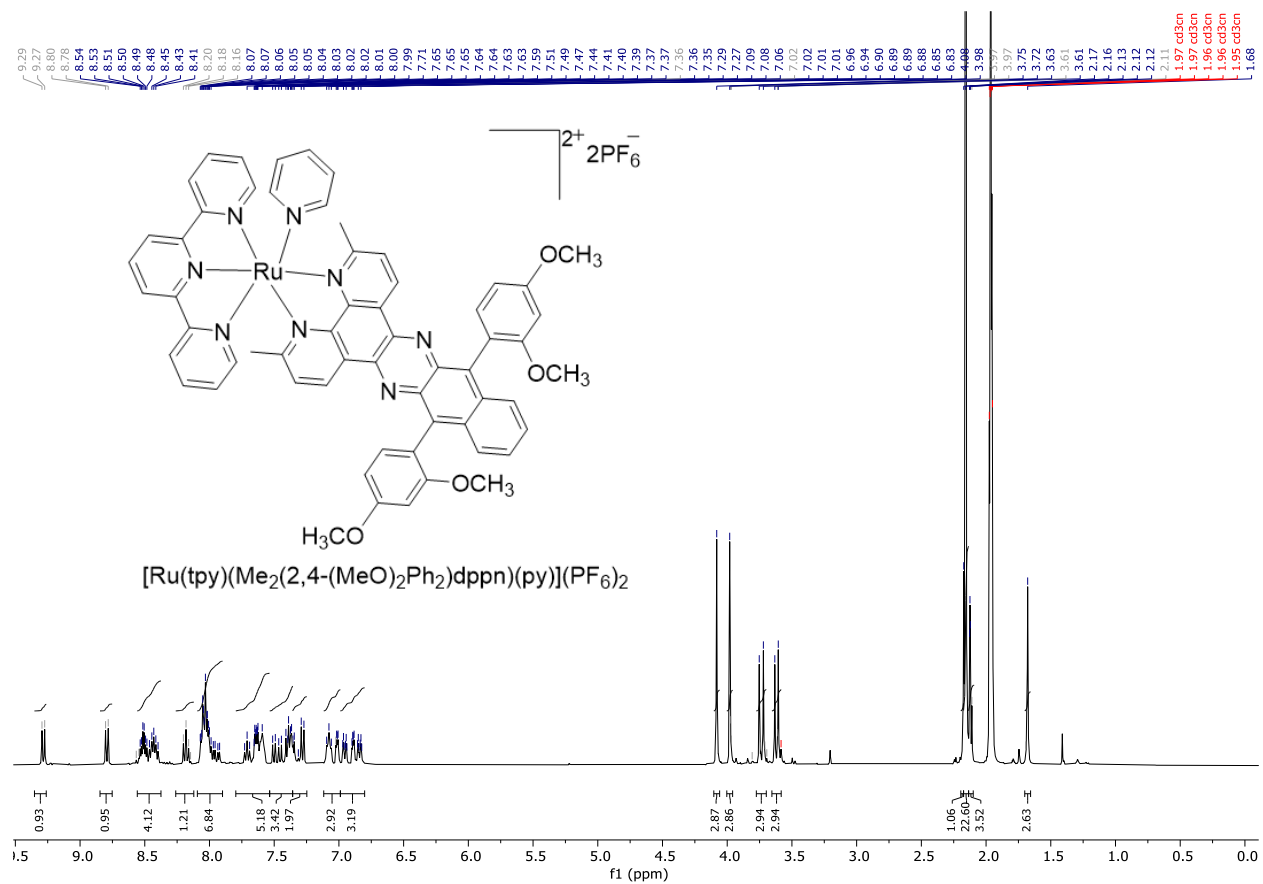

**Figure S18:**  $^1H$  NMR of compound 10 in CD<sub>3</sub>CN

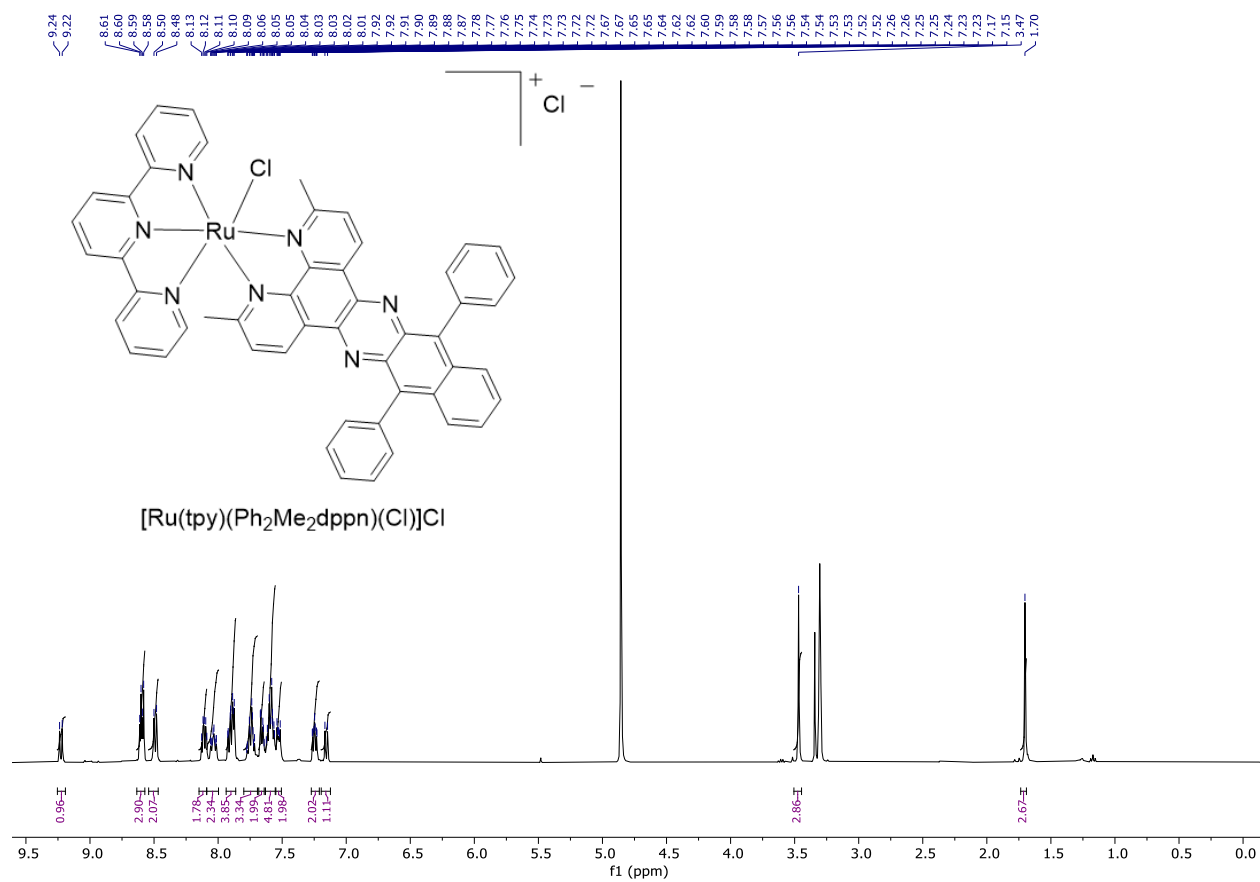

**Figure S19:**  $^1\text{H}$  NMR of  $[\text{Ru}(\text{tpy})(\text{Ph}_2\text{Me}_2\text{dppn})(\text{Cl})]\text{Cl}$  in  $\text{CD}_3\text{OD}$

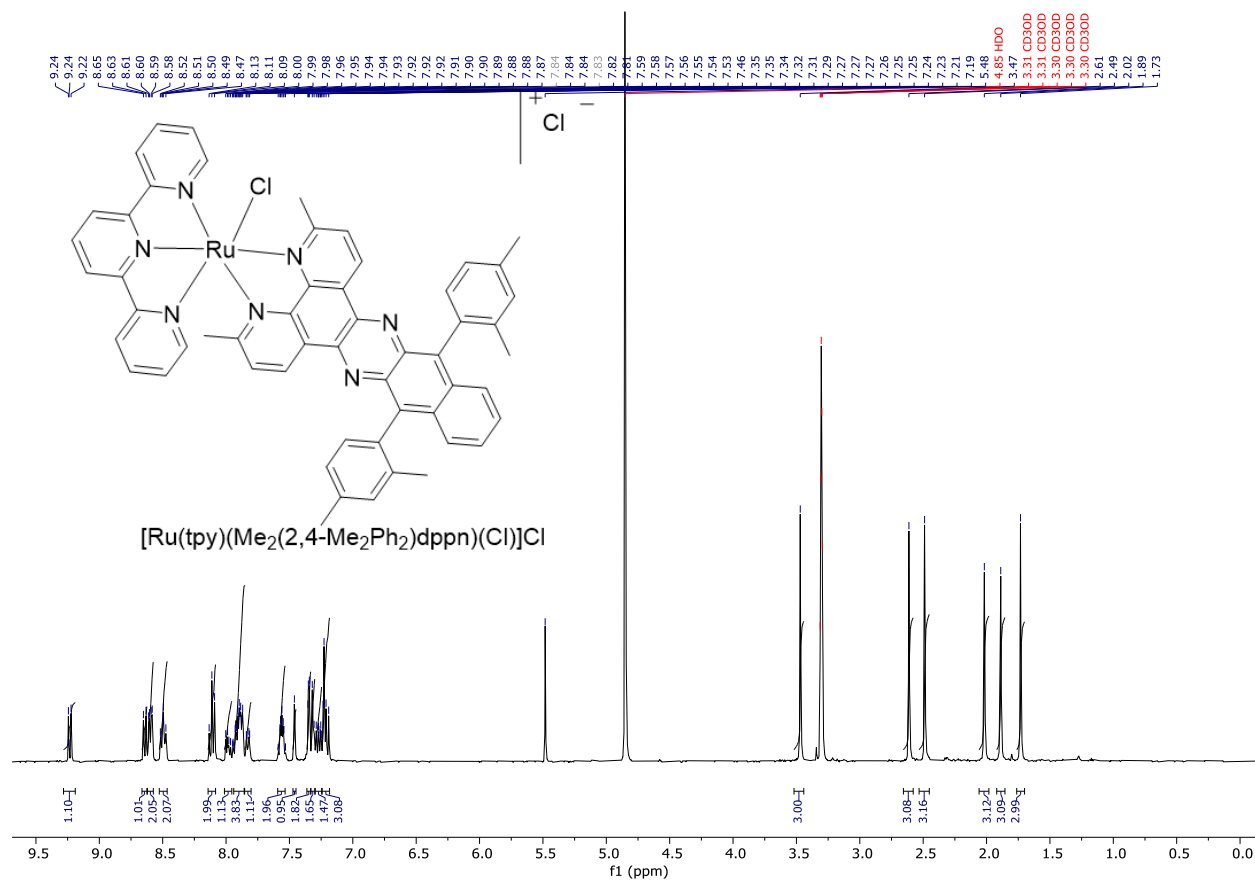

**Figure S20:**  $^1\text{H}$  NMR of  $[\text{Ru}(\text{tpy})(2,4\text{-Me}_2\text{Ph}_2\text{Me}_2\text{dppn})(\text{Cl})]\text{Cl}$  in  $\text{CD}_3\text{OD}$

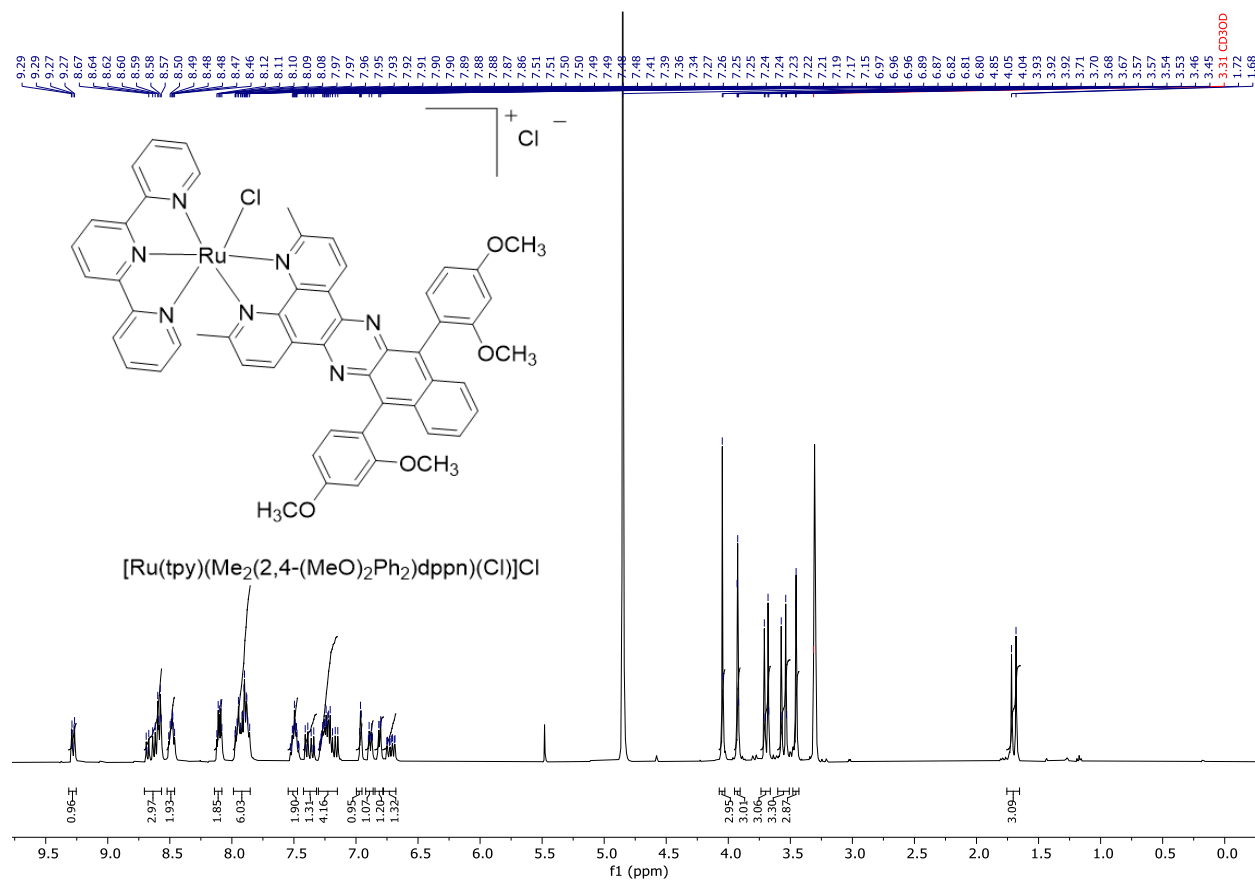

**Figure S21:**  $^1\text{H}$  NMR  $[\text{Ru}(\text{tpy})(\text{Me}_2(2,4-(\text{MeO})_2\text{Ph})\text{dppn})(\text{Cl})]\text{Cl}$  in  $\text{CD}_3\text{OD}$

## Compound 1

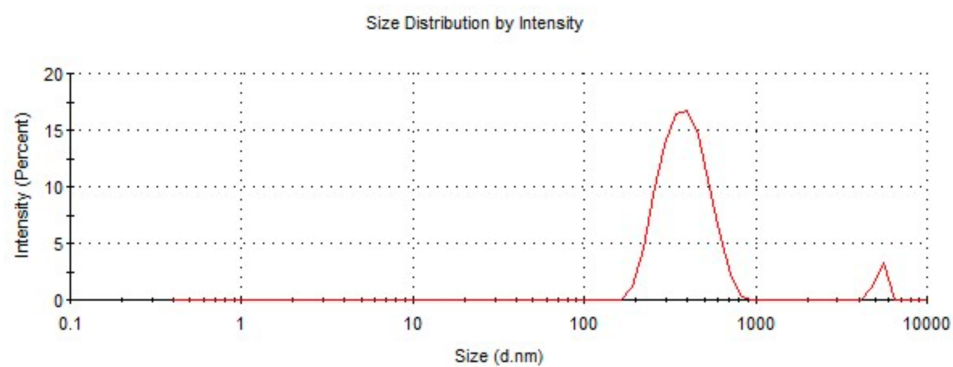

## Compound 8

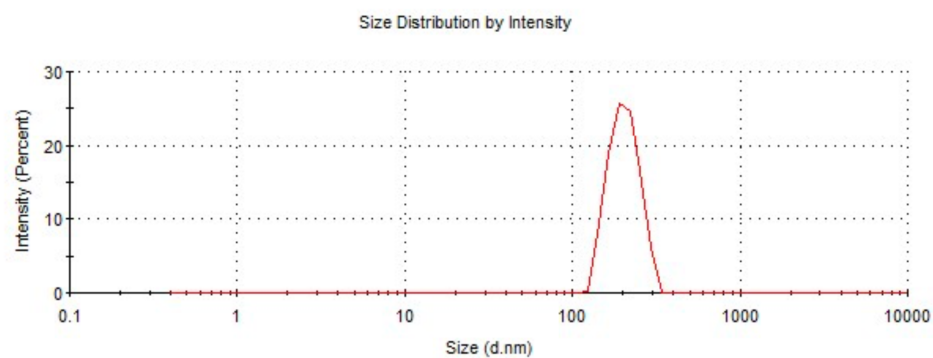

## Compound 9

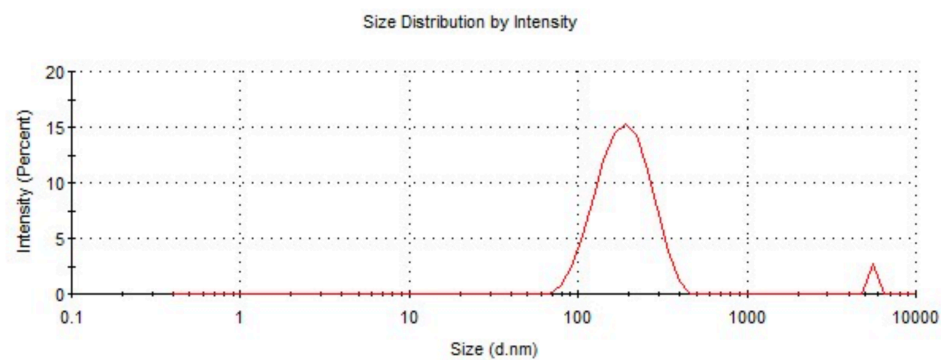

**Figure S22.** Dynamic light scattering data for compounds **1**, **8** and **9** (5  $\mu$ M) collected in PBS buffer (0.1 M, pH 7.4) at  $298 \pm 3$  K.

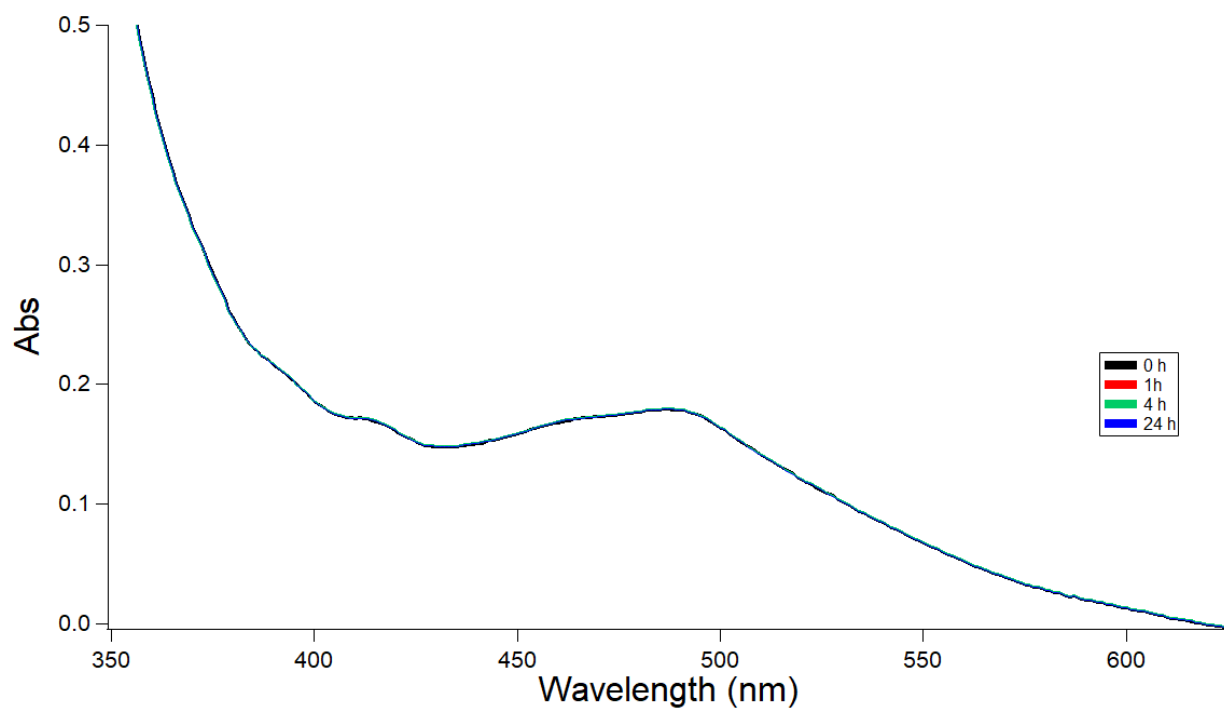

**Figure S23:** UV-vis spectrum of **8** in PBS after heating at 37 °C for 0 h (black), 1 h (red), 4 h (green), or 24 h (blue)

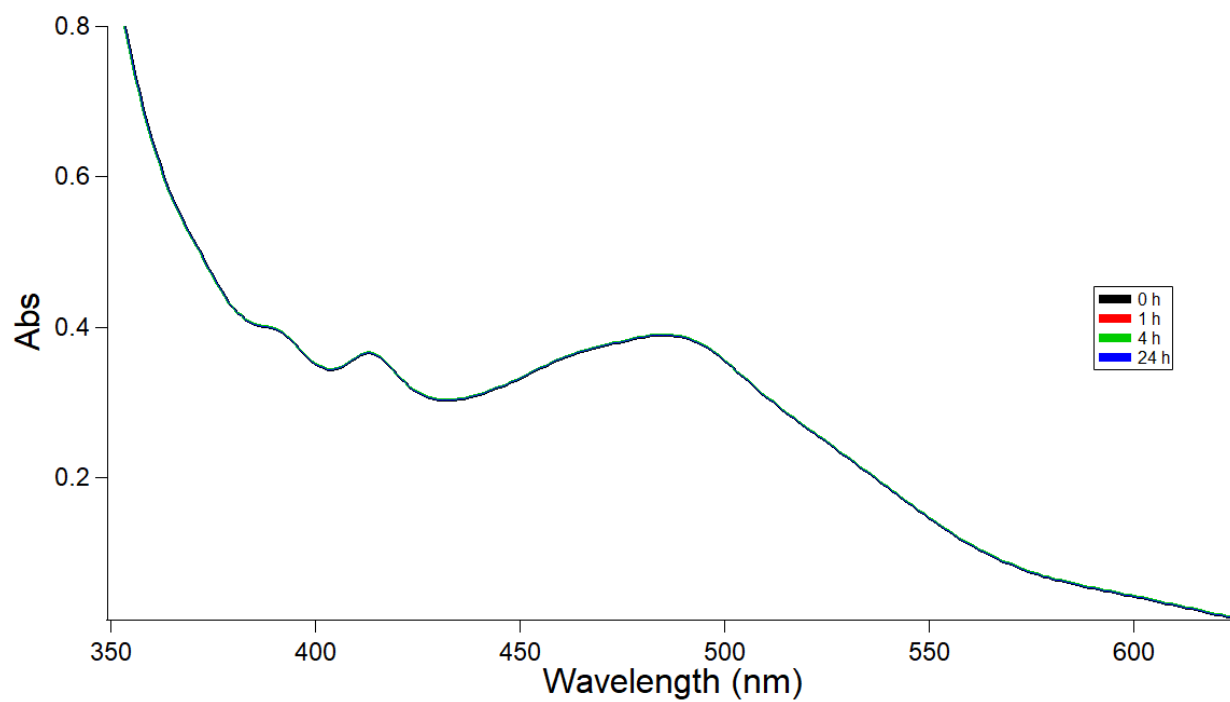

**Figure S24:** UV-vis spectrum of **9** in PBS after heating at 37 °C for 0 h (black), 1 h (red), 4 h (green), or 24 h (blue)



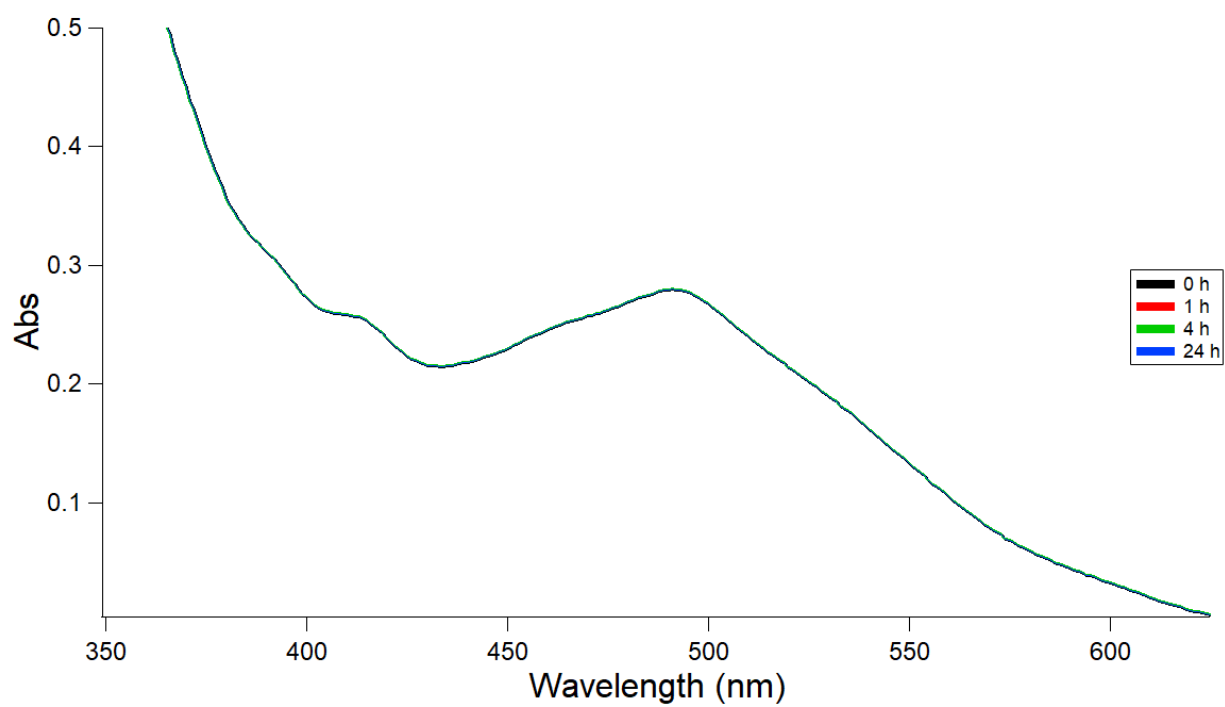

**Figure S25:** UV-vis spectrum of **10** in PBS after heating at 37 °C for 0 h (black), 1 h (red), 4 h (green), or 24 h (blue)

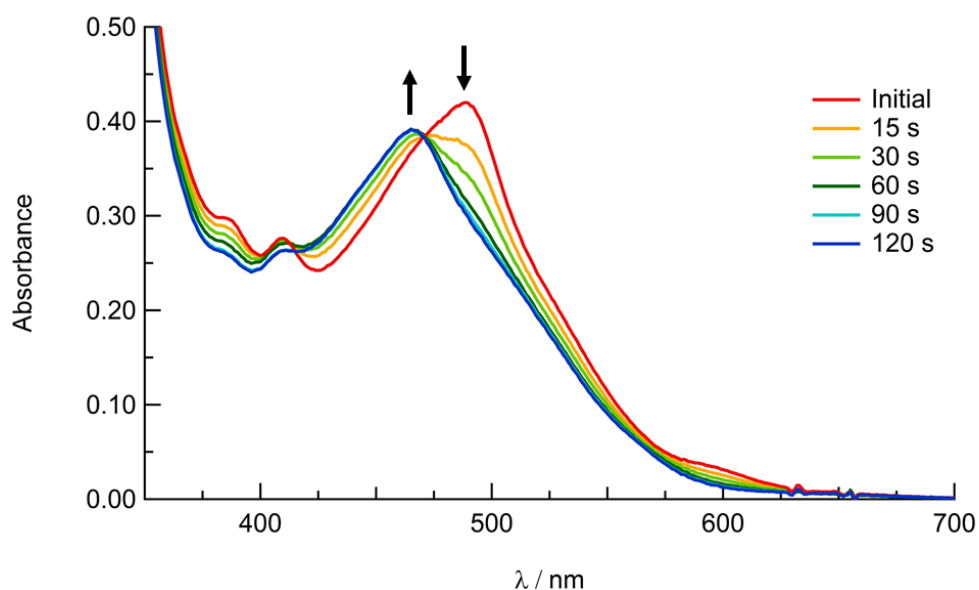

**Figure S26:** Changes in the electronic absorption spectra of **8** upon irradiation ( $\lambda_{\text{irr}} \geq 395$  nm) in  $\text{CH}_3\text{CN}$  under a  $\text{N}_2$  atmosphere,  $t_{\text{irr}} = 15, 30, 60, 90$ , and 120 seconds.

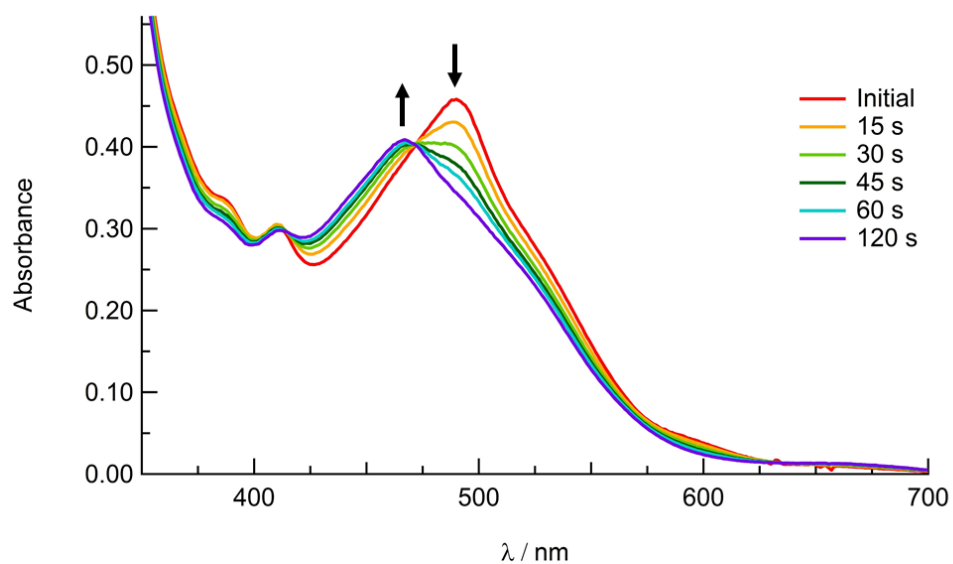

**Figure S27:** Changes in the electronic absorption spectra of **9** upon irradiation ( $\lambda_{\text{irr}} \geq 395$  nm) in  $\text{CH}_3\text{CN}$  under a  $\text{N}_2$  atmosphere,  $t_{\text{irr}} = 15, 30, 60$ , and 120 seconds.

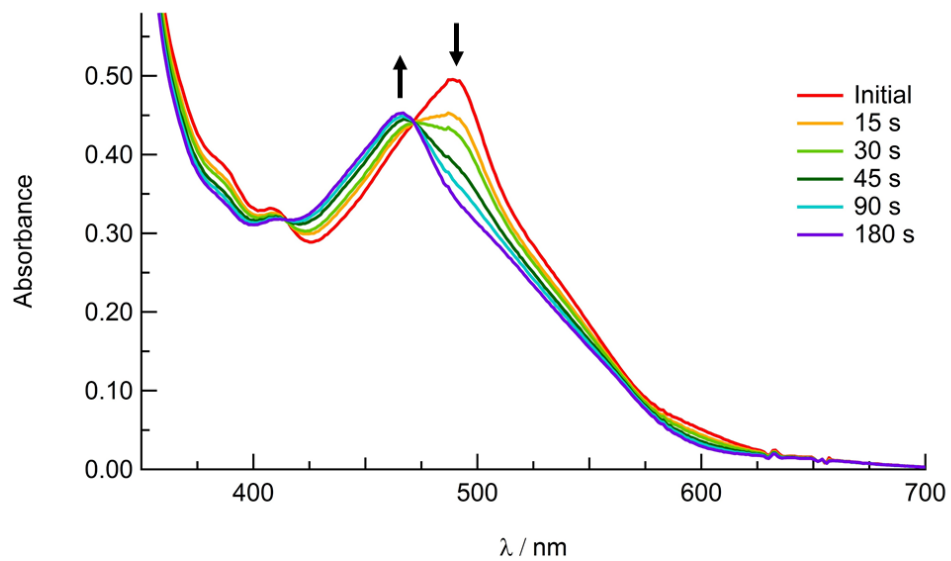

**Figure S28:** Changes in the electronic absorption spectra of **10** upon irradiation ( $\lambda_{\text{irr}} \geq 395$  nm) in  $\text{CH}_3\text{CN}$  under a  $\text{N}_2$  atmosphere,  $t_{\text{irr}} = 15, 30, 60$ , and  $120$  seconds.
